# Supplementary material for: LncRNA LUCRC Regulates Colorectal Cancer Cell Growth and Tumorigenesis by Targeting Endoplasmic Reticulum Stress Response
Source: Front Genet. 2020 Jan 31;10:1409. doi: 10.3389/fgene.2019.01409 (PMC7005251; doi:10.3389/fgene.2019.01409)
Supplement: Supplementary file 3 [file Table_2.xlsx]

## Sheet: Sheet2
Name	Sequence		Table S2. Targeting sequences for all siRNAs used in this study. Targeting sequences of siRNAs designed to knock down lncRNAs as indicated were shown.
FAM83H-AS1	5’-AUACUUGACGUGAUUCAGC-3’
MNX1-AS1	5’-UAUGUUGUCUGCGUUGUUC-3’
RNASEH1-AS1	5’-AACAUGGUCCAUCUCGACC-3’
LOC105370333	5’-UAGUACCACAUCGAACUGG-3’
OLMALINC	5’-AGAAUCUCGGGUUAUGAGG-3’
SNHG8	5’-ACUACGAUAAGUCCAUUGC-3’
LUCRC	5’-UGUACCUCUUCUCUAGCAG-3’
VPS9D1-AS1	5’-UGACUCUGCACCCAGCUCC-3’
LOC101927811	5’-UUCUUCAACAACUCCAUAG-3’
GAS5	5’-CAGCUUAAUGGUUCUGCUC-3’
